# Supplementary material for: Single-cell analysis reveals OSM-mediated osteogenic differentiation in Kashin-Beck disease bone hyperplasia
Source: Research Square preprint supplement (doi:10.21203/rs.3.rs-7414397/v1), 2025-09-03
Supplement: Supplementary file 1 [file 901edc671d7993fc8ba9e5a8.xlsx]

## Sheet: Sup table 1
Sup table 1. The proportion of each cell group in different samples
Cluster	N	OA_1	OA_2	KBD_1	KBD_2
Adherent cells	0.00246305	0.00286944	0.00190213	0.00087745	0.0005112
B cells	0.0261814	0.0681492	0.00423656	0.00087745	0.0010224
Endothelial	0.191388	0.113702	0.148712	0.051672	0.265924
ER_stress response cells	0.0319285	0.109039	0.144562	0.0359754	0.062877
HSP+ cells	0.0083014	0.133788	0.102542	0.0150141	0.0357837
Mesenchymal lineage cells	0.26528	0.210545	0.369964	0.783855	0.422247
Myeloid cells	0.0570151	0.0315638	0.00907833	0.00370479	0.0048052
Osteoclast	0.0026455	0	0.00146982	0.000682461	0.0009202
SMC	0.15645	0.168221	0.0881895	0.0597641	0.156426
T cells	0.11996	0.088594	0.0378696	0.000584966	0.0038851
Unknown	0.138387	0.0735294	0.091475	0.0469923	0.0455986

## Sheet: Sup table 2
Sup table 2. Marker genes in mesenchymal subclusters
p_val	avg_log2FC	pct.1	pct.2	p_val_adj	cluster	gene
1.6442e-296	0.271482	0.993	0.968	6.01795e-292	0	CXCL8
1.03039e-292	0.423548	0.884	0.741	3.77132e-288	0	CXCL2
2.51156e-260	0.269719	0.987	0.94	9.19257e-256	0	CXCL3
2.47252e-184	0.26393	0.808	0.815	9.04969e-180	0	RND3
5.14286e-77	0.324579	0.604	0.495	1.88234e-72	0	CCL20
2.69982e-96	0.276402	0.735	0.562	9.8816e-92	1	MGST1
5.42049e-80	0.312903	0.693	0.545	1.98395e-75	1	CXCL5
4.65489e-75	0.253257	0.697	0.581	1.70374e-70	1	AKAP12
4.84003e-75	0.361096	0.5	0.358	1.7715e-70	1	PTX3
0	0.453189	0.926	0.598	0	2	COL1A2
1.14588e-296	0.331198	0.628	0.29	4.19404e-292	2	ADAM12
6.44872e-284	0.478578	0.876	0.525	2.36029e-279	2	COL1A1
1.84265e-277	0.39706	0.839	0.49	6.7443e-273	2	SPARC
1.00214e-270	0.30082	0.686	0.336	3.66793e-266	2	GPX8
1.7245e-265	0.403665	0.871	0.617	6.31184e-261	2	COL6A3
1.38154e-261	0.268574	0.447	0.165	5.05656e-257	2	TMEM119
2.73121e-261	0.370877	0.902	0.675	9.99652e-257	2	COL6A2
1.29684e-260	0.391905	0.901	0.668	4.74655e-256	2	COL6A1
1.7123e-256	0.347567	0.731	0.389	6.26721e-252	2	FBN1
3.3782e-254	0.310976	0.981	0.827	1.23646e-249	2	CALD1
7.14776e-244	0.378881	0.819	0.494	2.61615e-239	2	TUBA1A
4.18241e-243	0.384126	0.765	0.446	1.53081e-238	2	MYL9
9.52053e-235	0.297231	0.577	0.275	3.48461e-230	2	VCAN
1.1714e-233	0.354097	0.975	0.767	4.28743e-229	2	IGFBP4
2.87126e-230	0.357845	0.832	0.506	1.05091e-225	2	INSIG1
1.66662e-223	0.314162	0.669	0.374	6.09998e-219	2	SQLE
5.11994e-218	0.325109	0.665	0.365	1.87395e-213	2	MSMO1
2.34154e-217	0.282028	0.596	0.293	8.57026e-213	2	COL5A2
9.89423e-216	0.319945	0.754	0.43	3.62139e-211	2	HTRA1
2.34565e-214	0.313064	0.74	0.442	8.58532e-210	2	LIMA1
5.05323e-213	0.355809	0.952	0.715	1.84953e-208	2	TPM2
3.96849e-212	0.264167	0.69	0.385	1.45251e-207	2	MYOF
1.56289e-203	0.358142	0.844	0.566	5.72032e-199	2	GLIPR1
5.86532e-203	0.255143	0.643	0.349	2.14677e-198	2	FAM114A1
6.40216e-200	0.396682	0.885	0.569	2.34325e-195	2	COL3A1
6.85138e-198	0.266922	0.656	0.352	2.50767e-193	2	ANPEP
1.31213e-193	0.344209	0.952	0.716	4.80252e-189	2	CAV1
2.01256e-193	0.252347	0.495	0.23	7.36617e-189	2	PDGFRB
3.68162e-193	0.260241	0.642	0.357	1.34751e-188	2	LAMC1
2.52081e-191	0.285017	0.675	0.366	9.22642e-187	2	EVA1A
1.35207e-190	0.276901	0.674	0.396	4.9487e-186	2	VCL
4.74531e-186	0.308117	0.739	0.447	1.73683e-181	2	SERPINH1
1.96204e-177	0.33224	0.837	0.538	7.18127e-173	2	C12orf75
2.11888e-177	0.283794	0.831	0.53	7.75532e-173	2	CAVIN3
5.58571e-176	0.26122	0.524	0.258	2.04443e-171	2	CTHRC1
8.68365e-175	0.258109	0.66	0.383	3.1783e-170	2	TGFB1I1
1.11233e-174	0.279304	0.543	0.276	4.07123e-170	2	PAPPA
1.1255e-171	0.40043	0.758	0.485	4.11944e-167	2	TAGLN
4.10629e-168	0.265165	0.789	0.519	1.50294e-163	2	RRBP1
6.5399e-168	0.302394	0.888	0.632	2.39367e-163	2	COTL1
1.74299e-167	0.289462	0.759	0.462	6.37951e-163	2	PRSS23
6.68729e-165	0.334225	0.515	0.268	2.44761e-160	2	PLAU
1.61043e-163	0.268639	0.767	0.492	5.89434e-159	2	MYH9
2.30466e-163	0.333694	0.925	0.688	8.43528e-159	2	SERPINE1
6.02492e-159	0.306888	0.778	0.493	2.20518e-154	2	CCDC80
1.25855e-158	0.271199	0.824	0.547	4.60641e-154	2	CNN3
2.13584e-158	0.251872	0.596	0.333	7.81739e-154	2	FSTL3
2.29125e-158	0.252704	0.683	0.391	8.38621e-154	2	BEX3
2.16574e-157	0.286092	0.777	0.531	7.92681e-153	2	CYP51A1
2.1011e-156	0.345679	0.8	0.49	7.69023e-152	2	HAS2
2.20033e-155	0.294227	0.712	0.427	8.05342e-151	2	TGFBI
4.48572e-143	0.285804	0.868	0.643	1.64182e-138	2	LIMS1
1.22621e-142	0.261445	0.511	0.274	4.48805e-138	2	APOE
5.55566e-142	0.265304	0.475	0.242	2.03343e-137	2	CFD
1.9843e-141	0.301274	0.715	0.448	7.26272e-137	2	TNC
1.40712e-137	0.308722	0.889	0.62	5.15022e-133	2	FN1
8.79639e-137	0.250782	0.812	0.566	3.21957e-132	2	ACTN1
2.4697e-134	0.297816	0.365	0.166	9.03936e-130	2	POSTN
1.96458e-124	0.253668	0.792	0.566	7.19057e-120	2	FDPS
3.0881e-124	0.327889	0.794	0.558	1.13027e-119	2	ID3
1.3433e-123	0.258773	0.895	0.691	4.91661e-119	2	PRRX1
3.70064e-112	0.275743	0.922	0.714	1.35447e-107	2	TPM1
2.35311e-110	0.275848	0.734	0.492	8.61261e-106	2	ANGPTL4
2.51616e-110	0.283923	0.761	0.504	9.20939e-106	2	ID1
8.95679e-85	0.259995	0.766	0.57	3.27827e-80	2	AKAP12
3.47956e-243	0.434228	0.904	0.815	1.27355e-238	3	DCN
7.08023e-131	0.432054	0.549	0.339	2.59143e-126	3	CD55
1.5126e-126	0.373973	0.782	0.732	5.53628e-122	3	MT1X
3.60149e-123	0.431383	0.505	0.316	1.31818e-118	3	SMOX
2.61698e-87	0.337656	0.467	0.318	9.5784e-83	3	FOXC2
2.7532e-86	0.312402	0.686	0.605	1.0077e-81	3	PMP22
1.12504e-84	0.36879	0.701	0.576	4.11775e-80	3	C11orf96
1.83646e-63	0.259743	0.69	0.63	6.72163e-59	3	BTG1
1.98993e-60	0.283811	0.584	0.455	7.28334e-56	3	CD9
3.44607e-59	0.27156	0.677	0.656	1.2613e-54	3	NNMT
7.59082e-55	0.274917	0.343	0.214	2.77832e-50	3	ISG20
5.98472e-46	0.29024	0.645	0.543	2.19047e-41	3	AKR1C2
4.92906e-42	0.250025	0.422	0.296	1.80409e-37	3	BMP2
3.00526e-41	0.261602	0.618	0.547	1.09996e-36	3	TSC22D1
1.58819e-30	0.265736	0.606	0.585	5.81294e-26	3	IL11
0	0.696398	0.858	0.537	0	4	TNFAIP6
0	0.563497	0.889	0.565	0	4	PTGES
0	0.562333	0.436	0.113	0	4	HSD11B1
0	0.285737	0.999	0.982	0	4	SOD2
2.59016e-278	0.412328	0.274	0.053	9.48023e-274	4	C2CD4B
6.23808e-271	0.401057	0.934	0.764	2.2832e-266	4	LGALS3
3.90681e-264	0.603843	0.859	0.561	1.42993e-259	4	C11orf96
6.85793e-255	0.430359	0.948	0.8	2.51007e-250	4	AKR1B1
1.02011e-244	0.575038	0.848	0.592	3.7337e-240	4	COL3A1
6.40974e-243	0.449349	0.95	0.811	2.34603e-238	4	DCN
1.71216e-242	0.429051	0.379	0.109	6.26666e-238	4	CEMIP
1.76634e-220	0.377787	0.561	0.254	6.46496e-216	4	C1S
5.71222e-204	0.422913	0.749	0.493	2.09073e-199	4	NQO2
1.17118e-200	0.353242	0.898	0.728	4.28665e-196	4	ITM2B
8.29619e-196	0.427007	0.724	0.42	3.03649e-191	4	PNRC1
1.20809e-195	0.281458	0.282	0.076	4.42172e-191	4	RASD1
2.01454e-188	0.299416	0.409	0.155	7.37343e-184	4	ADD3
6.16303e-185	0.459264	0.846	0.651	2.25573e-180	4	SRGN
3.96115e-180	0.352263	0.428	0.167	1.44982e-175	4	SLC16A6
4.69408e-178	0.32026	0.475	0.208	1.71808e-173	4	C1R
1.83887e-177	0.436232	0.613	0.336	6.73046e-173	4	AKR1C3
4.45836e-175	0.439888	0.595	0.325	1.6318e-170	4	NINJ1
2.59879e-165	0.435663	0.829	0.64	9.51185e-161	4	NNMT
1.64164e-163	0.369662	0.882	0.685	6.00858e-159	4	CTSD
2.34814e-162	0.361423	0.917	0.743	8.59444e-158	4	CYP1B1
3.25371e-161	0.305911	0.972	0.887	1.19089e-156	4	AKR1C1
3.02413e-158	0.272445	0.323	0.116	1.10686e-153	4	RUNX2
8.23578e-157	0.47291	0.506	0.253	3.01438e-152	4	CFD
2.11326e-155	0.260438	0.337	0.122	7.73474e-151	4	SPON1
1.32266e-151	0.466561	0.779	0.531	4.84106e-147	4	LUM
2.15799e-141	0.262608	0.315	0.117	7.89846e-137	4	PLEKHA5
3.25056e-138	0.497808	0.754	0.532	1.18974e-133	4	AKR1C2
1.36141e-137	0.251039	0.298	0.104	4.98291e-133	4	CFB
1.88209e-137	0.41824	0.54	0.294	6.88865e-133	4	ID4
3.08303e-137	0.381432	0.597	0.336	1.12842e-132	4	CD55
4.30377e-136	0.331297	0.864	0.67	1.57522e-131	4	SDCBP
4.41365e-133	0.506877	0.467	0.234	1.61544e-128	4	G0S2
1.5661e-132	0.321522	0.86	0.689	5.7321e-128	4	WTAP
2.71544e-129	0.327796	0.564	0.312	9.93877e-125	4	SMOX
3.10726e-127	0.334611	0.867	0.688	1.13729e-122	4	NFKBIA
5.6656e-127	0.345948	0.357	0.154	2.07367e-122	4	VCAM1
1.57118e-122	0.334792	0.671	0.461	5.75068e-118	4	NBL1
3.28767e-120	0.277852	0.84	0.663	1.20332e-115	4	TMEM59
1.71821e-119	0.342308	0.809	0.63	6.28883e-115	4	NAMPT
2.46975e-119	0.481931	0.563	0.347	9.03952e-115	4	NMB
5.10965e-119	0.253755	0.493	0.268	1.87018e-114	4	WIPI1
7.88434e-118	0.359968	0.553	0.333	2.88575e-113	4	IFI30
7.31946e-117	0.372348	0.709	0.457	2.679e-112	4	ID2
6.50508e-115	0.385672	0.34	0.145	2.38092e-110	4	MGP
5.27153e-114	0.357555	0.753	0.557	1.92943e-109	4	CAVIN3
7.86721e-113	0.295592	0.517	0.29	2.87948e-108	4	LUCAT1
1.32538e-112	0.255719	0.482	0.26	4.85101e-108	4	SMIM14
3.77135e-104	0.353093	0.922	0.792	1.38035e-99	4	SERPINE2
3.89967e-104	0.351332	0.66	0.449	1.42732e-99	4	CD9
7.48412e-104	0.2947	0.785	0.594	2.73926e-99	4	TYMP
2.83124e-101	0.341912	0.737	0.535	1.03626e-96	4	TSC22D1
7.14001e-98	0.272038	0.333	0.155	2.61332e-93	4	SLC7A2
7.29756e-97	0.250725	0.903	0.758	2.67098e-92	4	GPX4
1.77415e-96	0.281928	0.442	0.242	6.49358e-92	4	MEDAG
2.35008e-96	0.508167	0.485	0.295	8.60152e-92	4	IGFBP5
3.07351e-95	0.322	0.807	0.631	1.12493e-90	4	GLRX
1.46882e-93	0.295141	0.789	0.593	5.37601e-89	4	NUPR1
8.41157e-93	0.284377	0.786	0.6	3.07872e-88	4	TCEAL9
3.48988e-91	0.282332	0.755	0.559	1.27733e-86	4	IL1R1
3.27314e-89	0.285413	0.746	0.546	1.198e-84	4	SLC39A14
4.86523e-89	0.274461	0.4	0.209	1.78072e-84	4	ISG20
5.66848e-86	0.290223	0.771	0.597	2.07472e-81	4	NPC2
7.6359e-86	0.268955	0.771	0.575	2.79482e-81	4	JUND
4.00868e-84	0.283128	0.609	0.406	1.46722e-79	4	CYGB
9.62364e-84	0.270227	0.674	0.513	3.52235e-79	4	LSM6
7.31285e-82	0.254346	0.75	0.565	2.67658e-77	4	SNX9
8.29573e-82	0.254102	0.494	0.298	3.03632e-77	4	TNFAIP8
1.21177e-81	0.25107	0.466	0.289	4.43519e-77	4	TPGS2
1.68594e-81	0.251025	0.745	0.577	6.17071e-77	4	CYSTM1
3.07889e-80	0.30525	0.614	0.425	1.1269e-75	4	CEBPD
1.05553e-79	0.293287	0.602	0.409	3.86335e-75	4	ARL4C
3.41182e-78	0.269091	0.775	0.608	1.24876e-73	4	CYBA
1.21858e-77	0.266202	0.477	0.298	4.46013e-73	4	TWIST1
2.77378e-77	0.279453	0.642	0.433	1.01523e-72	4	DDIT4
1.08032e-75	0.259145	0.705	0.513	3.9541e-71	4	PRDX2
5.11919e-75	0.262999	0.653	0.473	1.87367e-70	4	JUNB
1.26659e-73	0.264496	0.63	0.459	4.63583e-69	4	AK1
4.17313e-73	0.299667	0.838	0.688	1.52741e-68	4	PTGS2
7.60398e-68	0.354758	0.484	0.317	2.78313e-63	4	CRYAB
2.47006e-67	0.261893	0.39	0.226	9.04066e-63	4	MAFB
5.7989e-64	0.268313	0.552	0.388	2.12245e-59	4	MT1F
1.2564e-63	0.254529	0.512	0.344	4.59857e-59	4	SLC5A3
3.4915e-55	0.261935	0.609	0.471	1.27792e-50	4	IFITM2
1.18616e-52	0.340608	0.537	0.385	4.34145e-48	4	C15orf48
3.08148e-44	0.250258	0.548	0.414	1.12785e-39	4	IGFBP6
6.02499e-29	0.312509	0.282	0.187	2.20521e-24	4	CHI3L1
0	0.919226	0.724	0.224	0	5	STMN1
0	0.823892	0.643	0.09	0	5	PCLAF
0	0.79992	0.643	0.106	0	5	TYMS
0	0.77369	0.547	0.059	0	5	UBE2C
0	0.772709	0.605	0.079	0	5	RRM2
0	0.749226	0.676	0.236	0	5	PTTG1
0	0.736219	0.527	0.051	0	5	CENPF
0	0.686999	0.614	0.158	0	5	HMGB2
0	0.678417	0.518	0.047	0	5	BIRC5
0	0.669174	0.493	0.048	0	5	TOP2A
0	0.653437	0.515	0.09	0	5	CCNB1
0	0.642999	0.488	0.038	0	5	MKI67
0	0.637039	0.523	0.071	0	5	TPX2
0	0.607114	0.475	0.052	0	5	CDC20
0	0.596162	0.569	0.126	0	5	CENPW
0	0.573891	0.543	0.086	0	5	MAD2L1
0	0.572036	0.472	0.039	0	5	NUSAP1
0	0.560004	0.585	0.141	0	5	UBE2T
0	0.544068	0.548	0.125	0	5	SMC4
0	0.518987	0.466	0.046	0	5	PRC1
0	0.517793	0.454	0.046	0	5	CDKN3
0	0.517792	0.959	0.846	0	5	H2AFZ
0	0.487684	0.502	0.075	0	5	ZWINT
0	0.484885	0.388	0.035	0	5	CDK1
0	0.483103	0.547	0.176	0	5	H2AFX
0	0.457219	0.462	0.055	0	5	TK1
0	0.451763	0.397	0.026	0	5	HMMR
0	0.433953	0.503	0.129	0	5	ATAD2
0	0.429223	0.515	0.144	0	5	MCM7
0	0.426044	0.414	0.031	0	5	PBK
0	0.4171	0.376	0.04	0	5	AURKA
0	0.412791	0.393	0.032	0	5	ANLN
0	0.410667	0.38	0.03	0	5	GTSE1
0	0.403961	0.336	0.018	0	5	ASPM
0	0.399172	0.438	0.064	0	5	CLSPN
0	0.392437	0.367	0.024	0	5	CCNB2
0	0.387141	0.353	0.025	0	5	AURKB
0	0.375348	0.408	0.05	0	5	CENPM
0	0.374847	0.412	0.065	0	5	KIF20B
0	0.373007	0.366	0.028	0	5	NCAPG
0	0.371155	0.379	0.05	0	5	CKAP2
0	0.35794	0.414	0.061	0	5	ORC6
0	0.354361	0.326	0.017	0	5	DLGAP5
0	0.348657	0.339	0.025	0	5	SPC25
0	0.346651	0.352	0.028	0	5	CCNA2
0	0.344315	0.416	0.09	0	5	CENPK
0	0.334253	0.395	0.063	0	5	GINS2
0	0.324078	0.32	0.019	0	5	NDC80
0	0.322856	0.295	0.018	0	5	PLK1
0	0.307365	0.342	0.043	0	5	KIF23
0	0.302977	0.303	0.018	0	5	DEPDC1
0	0.301078	0.377	0.061	0	5	PSMC3IP
0	0.288941	0.272	0.018	0	5	CDCA3
0	0.286383	0.298	0.019	0	5	NUF2
0	0.286179	0.312	0.027	0	5	DIAPH3
0	0.284264	0.341	0.061	0	5	SGO2
0	0.273994	0.29	0.023	0	5	CEP55
0	0.273352	0.273	0.02	0	5	CENPE
0	0.272439	0.306	0.025	0	5	SHCBP1
0	0.266176	0.275	0.023	0	5	ESCO2
0	0.265639	0.311	0.038	0	5	RAD51AP1
0	0.262228	0.294	0.026	0	5	TACC3
0	0.253682	0.257	0.024	0	5	CDCA8
0	0.253313	0.304	0.046	0	5	CENPU
0	0.250656	0.265	0.019	0	5	KNL1
1.8888e-307	0.365592	0.456	0.118	6.9132e-303	5	DHFR
2.5017e-303	0.492524	0.576	0.204	9.15647e-299	5	TMPO
5.19263e-303	0.437178	0.557	0.182	1.90055e-298	5	DNAJC9
7.91346e-299	0.288244	0.967	0.893	2.8964e-294	5	HMGB1
5.2838e-297	0.420374	0.514	0.157	1.93392e-292	5	TMEM106C
2.25601e-295	0.314578	0.408	0.097	8.25722e-291	5	CENPN
9.83779e-295	0.568566	0.876	0.69	3.60073e-290	5	UBE2S
4.67982e-291	0.276868	0.377	0.084	1.71286e-286	5	CHEK1
1.56891e-284	0.37298	0.479	0.14	5.74238e-280	5	PHF19
1.30829e-278	0.410077	0.534	0.175	4.78847e-274	5	RRM1
3.46172e-278	0.363027	0.478	0.14	1.26702e-273	5	CCDC34
3.82603e-275	0.314378	0.404	0.1	1.40037e-270	5	HELLS
5.87864e-271	0.252522	0.353	0.077	2.15164e-266	5	CENPH
1.85694e-268	0.413762	0.559	0.2	6.7966e-264	5	SMC2
7.43499e-258	0.454699	0.856	0.693	2.72128e-253	5	RANBP1
6.60796e-252	0.554268	0.72	0.387	2.41858e-247	5	CKS1B
1.77785e-240	0.34825	0.467	0.151	6.50712e-236	5	FEN1
2.44999e-237	0.713096	0.699	0.376	8.9672e-233	5	HIST1H4C
1.34442e-231	0.258085	0.308	0.069	4.92072e-227	5	FBXO5
6.56404e-230	0.348493	0.5	0.174	2.4025e-225	5	GMNN
7.54981e-225	0.336781	0.447	0.142	2.76331e-220	5	HMGB3
2.25187e-215	0.285939	0.408	0.122	8.24206e-211	5	MCM4
3.89894e-209	0.293293	0.417	0.132	1.42705e-204	5	KIF22
1.10904e-204	0.517755	0.758	0.498	4.05919e-200	5	DUT
1.30011e-204	0.510158	0.815	0.601	4.75853e-200	5	HMGN2
2.76349e-204	0.265104	0.373	0.108	1.01147e-199	5	ECT2
1.00901e-202	0.516688	0.712	0.386	3.69308e-198	5	CKS2
1.72389e-200	0.342053	0.488	0.182	6.3096e-196	5	SAC3D1
2.67533e-199	0.493579	0.692	0.423	9.79198e-195	5	DTYMK
3.28114e-194	0.488104	0.636	0.336	1.20093e-189	5	KPNA2
4.40383e-189	0.388176	0.482	0.183	1.61184e-184	5	TUBB3
6.19692e-188	0.269587	0.363	0.109	2.26813e-183	5	FAM111A
2.99444e-180	0.289835	0.399	0.123	1.096e-175	5	SULF1
8.45634e-174	0.256536	0.371	0.121	3.09511e-169	5	CDCA4
1.7576e-172	0.385781	0.561	0.261	6.433e-168	5	PCNA
1.16959e-170	0.530123	0.378	0.117	4.28083e-166	5	RPS4Y1
1.89452e-162	0.36153	0.614	0.312	6.93413e-158	5	SKA2
3.41141e-161	0.274794	0.889	0.81	1.24861e-156	5	TUBB4B
4.91258e-160	0.377417	0.647	0.352	1.79806e-155	5	MZT2A
2.07481e-159	0.489143	0.83	0.558	7.59402e-155	5	COL1A1
3.78983e-156	0.267099	0.427	0.163	1.38712e-151	5	MCM3
7.33759e-156	0.27641	0.484	0.203	2.68563e-151	5	PSIP1
1.53546e-155	0.381121	0.596	0.316	5.61993e-151	5	ANP32E
3.84399e-153	0.345346	0.564	0.285	1.40694e-148	5	PARP1
5.1675e-150	0.445731	0.678	0.444	1.89136e-145	5	JPT1
3.48231e-146	0.386581	0.802	0.612	1.27456e-141	5	DEK
4.64655e-146	0.403154	0.744	0.539	1.70068e-141	5	SIVA1
8.10069e-144	0.30755	0.512	0.24	2.96493e-139	5	USP1
2.83505e-134	0.377473	0.867	0.736	1.03766e-129	5	TPM1
3.78565e-134	0.321558	0.561	0.281	1.38559e-129	5	CARHSP1
4.69892e-134	0.412288	0.821	0.564	1.71985e-129	5	C12orf75
1.2878e-132	0.258425	0.455	0.202	4.71349e-128	5	BCL2L12
3.70919e-130	0.29	0.55	0.279	1.3576e-125	5	NCS1
1.95293e-129	0.4219	0.763	0.498	7.14791e-125	5	CCND1
1.96317e-128	0.272911	0.434	0.181	7.1854e-124	5	ACAT2
3.98199e-126	0.33957	0.811	0.661	1.45745e-121	5	NUCKS1
6.78369e-120	0.347043	0.638	0.407	2.4829e-115	5	DNMT1
1.25485e-116	0.314318	0.598	0.354	4.59287e-112	5	NUDT1
2.37013e-115	0.319804	0.662	0.421	8.67493e-111	5	RPA3
2.53674e-114	0.349536	0.743	0.558	9.28473e-110	5	H2AFV
6.26761e-106	0.255591	0.513	0.276	2.29401e-101	5	PPIH
8.68803e-106	0.312187	0.664	0.417	3.17991e-101	5	EMP2
1.04215e-105	0.259254	0.485	0.252	3.81436e-101	5	SAE1
5.29449e-105	0.333316	0.722	0.517	1.93784e-100	5	NASP
1.01561e-103	0.407511	0.728	0.516	3.71723e-99	5	FABP5
2.20301e-102	0.299885	0.621	0.379	8.06323e-98	5	CKLF
3.22549e-101	0.280357	0.607	0.367	1.18056e-96	5	PGP
9.20982e-101	0.274748	0.556	0.319	3.37089e-96	5	HACD3
2.50574e-99	0.303119	0.748	0.587	9.17127e-95	5	LSM5
5.07896e-98	0.258938	0.821	0.733	1.85895e-93	5	NAP1L1
2.70844e-94	0.285348	0.642	0.413	9.91315e-90	5	COMMD4
8.16086e-92	0.299559	0.722	0.57	2.98696e-87	5	LSM4
2.98895e-89	0.335026	0.836	0.646	1.09398e-84	5	FN1
1.73646e-88	0.29993	0.64	0.438	6.35562e-84	5	HMGN3
1.09778e-86	0.297156	0.728	0.548	4.01798e-82	5	YWHAH
3.25247e-84	0.295407	0.754	0.593	1.19043e-79	5	KPNB1
2.07961e-83	0.349092	0.585	0.398	7.61158e-79	5	ARL6IP1
2.53041e-82	0.284382	0.886	0.74	9.26154e-78	5	TPM2
6.85771e-81	0.264283	0.774	0.654	2.50999e-76	5	SRSF2
1.94536e-79	0.280039	0.601	0.391	7.1202e-75	5	SLC20A1
2.81166e-78	0.273881	0.737	0.578	1.02909e-73	5	SNRPD3
1.08919e-77	0.263072	0.599	0.396	3.98653e-73	5	RAD21
1.43498e-76	0.279237	0.697	0.521	5.25218e-72	5	CENPX
2.93367e-76	0.28996	0.718	0.516	1.07375e-71	5	PRDX2
6.8999e-74	0.272721	0.704	0.535	2.52543e-69	5	BUB3
2.91005e-72	0.259016	0.614	0.437	1.06511e-67	5	ETFB
2.05322e-66	0.256186	0.688	0.531	7.51499e-62	5	LSM2
1.50116e-65	0.27385	0.617	0.421	5.49439e-61	5	BEX3
4.1547e-65	0.282451	0.704	0.522	1.52066e-60	5	CCDC80
4.7886e-64	0.316882	0.72	0.528	1.75267e-59	5	ID1
2.37196e-63	0.254861	0.674	0.528	8.6816e-59	5	RAB34
7.19914e-62	0.307749	0.728	0.51	2.63496e-57	5	TAGLN
3.29794e-59	0.253708	0.73	0.528	1.20708e-54	5	SPARC
0	0.623365	0.533	0.125	0	6	TYMS
0	0.586717	0.509	0.111	0	6	PCLAF
0	0.448064	0.473	0.067	0	6	GINS2
0	0.428414	0.424	0.067	0	6	TK1
0	0.403686	0.299	0.011	0	6	CNN1
0	0.382798	0.425	0.074	0	6	CLSPN
0	0.372876	0.335	0.029	0	6	TINAGL1
0	0.35852	0.33	0.039	0	6	MCAM
0	0.342402	0.392	0.06	0	6	CENPM
0	0.335575	0.274	0.027	0	6	PPP1R14A
0	0.320842	0.375	0.049	0	6	E2F1
0	0.314421	0.416	0.075	0	6	MCM5
0	0.264281	0.269	0.027	0	6	ESAM
0	0.259092	0.324	0.037	0	6	CDT1
0	0.250017	0.26	0.028	0	6	FAM111B
1.81696e-296	0.378625	0.443	0.089	6.65026e-292	6	ZWINT
5.69825e-289	0.458266	0.565	0.15	2.08562e-284	6	MCM7
3.38998e-286	0.984523	0.863	0.508	1.24076e-281	6	TAGLN
2.65083e-285	0.299176	0.392	0.071	9.7023e-281	6	ORC6
2.02726e-272	0.295412	0.376	0.069	7.41998e-268	6	PSMC3IP
4.98891e-270	0.288365	0.357	0.063	1.82599e-265	6	CDC6
3.28383e-269	0.39631	0.455	0.102	1.20191e-264	6	MAD2L1
1.22066e-268	0.588903	0.469	0.116	4.46773e-264	6	MYLK
1.46484e-268	0.505629	0.453	0.1	5.36146e-264	6	RRM2
7.95932e-266	0.336166	0.275	0.038	2.91319e-261	6	ANKRD1
5.61612e-265	0.516601	0.545	0.147	2.05556e-260	6	THY1
1.51738e-258	0.331799	0.395	0.083	5.55375e-254	6	FGF1
1.58942e-258	0.433303	0.4	0.079	5.81745e-254	6	UBE2C
3.0981e-251	0.258858	0.307	0.048	1.13394e-246	6	CDK1
4.81487e-246	0.255697	0.412	0.089	1.76229e-241	6	CHEK1
4.42997e-242	0.321818	0.443	0.105	1.62141e-237	6	HELLS
3.21836e-241	0.382679	0.406	0.089	1.17795e-236	6	TPX2
8.04895e-241	0.27617	0.429	0.097	2.94599e-236	6	CENPK
4.2547e-237	0.420437	0.606	0.193	1.55726e-232	6	CRIM1
3.50288e-236	0.340142	0.356	0.067	1.28209e-231	6	BIRC5
3.87515e-231	0.408178	0.495	0.139	1.41834e-226	6	ATAD2
8.0798e-229	0.674809	0.645	0.24	2.95729e-224	6	STMN1
7.55549e-227	0.61722	0.904	0.737	2.76538e-222	6	TPM1
9.53051e-225	0.2835	0.335	0.064	3.48826e-220	6	PRC1
6.10313e-224	0.377137	0.524	0.155	2.23381e-219	6	UBE2T
6.81042e-223	0.326305	0.472	0.127	2.49268e-218	6	AC092807.3
7.54747e-220	0.329419	0.382	0.087	2.76245e-215	6	SFTA1P
4.47013e-219	0.380039	0.5	0.14	1.63611e-214	6	CENPW
6.73616e-217	0.295354	0.346	0.069	2.4655e-212	6	CDC20
7.93072e-216	0.288183	0.438	0.113	2.90272e-211	6	ARHGDIB
2.78984e-215	0.408623	0.568	0.19	1.02111e-210	6	DNAJC9
2.01943e-214	0.293457	0.404	0.098	7.39133e-210	6	NEXN
3.42509e-211	0.521297	0.933	0.741	1.25362e-206	6	TPM2
5.07075e-210	0.943666	0.584	0.235	1.85594e-205	6	ACTA2
4.79298e-209	0.338143	0.311	0.059	1.75428e-204	6	MKI67
6.81111e-209	0.407431	0.52	0.166	2.49294e-204	6	TMEM106C
1.75085e-208	0.271109	0.311	0.058	6.4083e-204	6	NUSAP1
7.61323e-204	0.861036	0.736	0.39	2.78652e-199	6	CCN2
3.00312e-198	0.272692	0.989	0.969	1.09917e-193	6	ACTB
3.79855e-193	0.714841	0.788	0.478	1.39031e-188	6	MYL9
4.38499e-190	0.260254	0.994	0.953	1.60495e-185	6	ACTG1
5.30612e-188	0.338799	0.436	0.128	1.94209e-183	6	DHFR
5.95267e-186	0.304528	0.441	0.127	2.17874e-181	6	MCM4
8.37608e-186	0.347233	0.503	0.165	3.06573e-181	6	MCM3
4.30648e-185	0.590032	0.648	0.293	1.57622e-180	6	BGN
3.67603e-183	0.275251	0.432	0.123	1.34546e-178	6	DDAH1
2.06609e-181	0.290987	0.334	0.074	7.56209e-177	6	CENPF
1.27591e-178	0.330145	0.487	0.157	4.66995e-174	6	FEN1
4.18909e-178	0.358604	0.517	0.181	1.53325e-173	6	GMNN
3.16809e-177	0.36358	0.531	0.187	1.15955e-172	6	SAC3D1
2.32943e-171	0.258406	0.3	0.065	8.52596e-167	6	CDKN3
2.01417e-170	0.262439	0.312	0.069	7.37208e-166	6	TOP2A
4.26649e-168	0.315666	0.462	0.149	1.56158e-163	6	PHF19
1.54289e-167	0.263884	0.448	0.139	5.64714e-163	6	RFC4
8.00737e-166	0.26172	0.435	0.132	2.93078e-161	6	SLC2A4RG
1.23117e-165	0.608382	0.415	0.121	4.5062e-161	6	RPS4Y1
1.12307e-163	0.470911	0.76	0.426	4.11056e-159	6	DTYMK
8.31444e-162	0.402855	0.618	0.265	3.04317e-157	6	PCNA
2.8269e-161	0.404435	0.967	0.848	1.03467e-156	6	H2AFZ
1.23343e-158	0.291824	0.52	0.188	4.51446e-154	6	PMM1
1.80198e-156	0.316412	0.385	0.113	6.59544e-152	6	DKK3
2.98718e-155	0.257066	0.329	0.086	1.09334e-150	6	COL18A1
6.57575e-155	0.333304	0.506	0.185	2.40679e-150	6	RRM1
2.20121e-154	0.653562	0.705	0.383	8.05667e-150	6	HIST1H4C
3.44949e-154	0.52748	0.804	0.501	1.26255e-149	6	DUT
1.36531e-152	0.310077	0.438	0.142	4.99716e-148	6	SMC4
1.5407e-151	0.33451	0.584	0.231	5.63913e-147	6	ARHGAP18
7.10059e-150	0.403748	0.878	0.696	2.59889e-145	6	RANBP1
1.06672e-148	0.418082	0.712	0.364	3.9043e-144	6	NME4
2.68677e-148	0.27959	0.52	0.19	9.83383e-144	6	PXDN
8.35969e-146	0.331559	0.503	0.194	3.05973e-141	6	FARP1
2.27272e-145	0.529224	0.66	0.344	8.31839e-141	6	HSPB1
2.44985e-145	0.484083	0.768	0.477	8.96669e-141	6	CSRP1
4.60319e-143	0.324759	0.491	0.176	1.68481e-138	6	HMGB2
4.25283e-141	0.271573	0.469	0.168	1.55658e-136	6	TRAM2
1.09935e-140	0.296721	0.535	0.21	4.02372e-136	6	SMC2
2.93534e-139	0.426507	0.689	0.374	1.07436e-134	6	PDLIM1
1.2942e-138	0.523603	0.81	0.516	4.7369e-134	6	FABP5
2.37386e-136	0.379106	0.51	0.208	8.68858e-132	6	NR2F2
2.87474e-136	0.346495	0.657	0.317	1.05218e-131	6	SKA2
3.006e-133	0.557812	0.632	0.328	1.10022e-128	6	COL4A1
1.59445e-132	0.505954	0.653	0.344	5.83583e-128	6	COL4A2
3.03392e-131	0.260256	0.454	0.167	1.11045e-126	6	TBC1D1
3.22537e-130	0.34413	0.604	0.289	1.18052e-125	6	PARP1
3.73272e-130	0.281763	0.519	0.212	1.36621e-125	6	CCND3
1.29346e-128	0.317112	0.519	0.216	4.73421e-124	6	TMPO
5.47653e-128	0.287396	0.485	0.19	2.00447e-123	6	LASP1
2.11078e-123	0.297094	0.546	0.238	7.72568e-119	6	CTPS1
2.92598e-123	0.289125	0.514	0.215	1.07094e-118	6	HYI
3.44001e-122	0.478245	0.768	0.536	1.25908e-117	6	CAVIN1
4.02848e-121	0.461892	0.834	0.605	1.47446e-116	6	HMGN2
1.68211e-120	0.260742	0.509	0.209	6.1567e-116	6	C19orf48
3.23731e-119	0.290495	0.569	0.253	1.18489e-114	6	PAWR
6.59488e-117	0.268109	0.476	0.189	2.41379e-112	6	H2AFX
5.54262e-116	0.253859	0.501	0.211	2.02865e-111	6	RFC2
6.16369e-116	0.361137	0.702	0.408	2.25597e-111	6	DNMT1
3.99666e-113	0.359884	0.719	0.409	1.46282e-108	6	TGFB1I1
1.6663e-112	0.296449	0.442	0.175	6.09884e-108	6	CSRP2
2.00533e-112	0.27028	0.537	0.238	7.33969e-108	6	CNN2
2.02915e-112	0.302298	0.591	0.286	7.4269e-108	6	ANXA6
2.21409e-110	0.395839	0.79	0.542	8.10378e-106	6	SIVA1
3.78778e-110	0.26735	0.563	0.255	1.38637e-105	6	NT5DC2
1.58787e-109	0.319701	0.626	0.309	5.81177e-105	6	PDLIM2
7.05108e-107	0.385517	0.794	0.548	2.58077e-102	6	YWHAH
1.48929e-106	0.357618	0.696	0.396	5.45095e-102	6	CKS1B
1.98644e-106	0.366406	0.799	0.569	7.27057e-102	6	LSM4
9.64055e-103	0.259247	0.578	0.278	3.52854e-98	6	PPIH
5.14673e-102	0.377918	0.781	0.544	1.88376e-97	6	SEPTIN11
5.48367e-102	0.277851	0.524	0.246	2.00708e-97	6	USP1
3.09214e-101	0.361001	0.906	0.743	1.13175e-96	6	CAV1
1.04802e-99	0.262662	0.617	0.312	3.83585e-95	6	POLR3K
9.26263e-99	0.272067	0.592	0.301	3.39021e-94	6	DBNL
1.73665e-98	0.275006	0.87	0.75	6.35631e-94	6	SLC25A6
1.6431e-97	0.250736	0.539	0.255	6.01392e-93	6	SAE1
3.40716e-97	0.358798	0.828	0.615	1.24706e-92	6	DEK
4.2659e-97	0.358529	0.835	0.597	1.56136e-92	6	SELENOW
2.74277e-96	0.336855	0.685	0.418	1.00388e-91	6	CFL2
8.83842e-95	0.280307	0.911	0.847	3.23495e-90	6	CALD1
1.68836e-94	0.319101	0.639	0.36	6.17957e-90	6	SLBP
1.77913e-94	0.27425	0.303	0.103	6.5118e-90	6	LY6K
1.01877e-93	0.371126	0.726	0.473	3.72882e-89	6	CHCHD10
1.91651e-92	0.320804	0.738	0.49	7.01462e-88	6	VDAC3
2.12153e-92	0.261806	0.617	0.325	7.76501e-88	6	C20orf27
5.0791e-91	0.258847	0.358	0.135	1.859e-86	6	IL7R
6.86401e-91	0.288776	0.638	0.353	2.5123e-86	6	COMMD7
8.67248e-91	0.325759	0.827	0.64	3.17421e-86	6	CLTB
2.40401e-90	0.322191	0.721	0.438	8.79893e-86	6	HMGN3
2.88301e-90	0.252501	0.607	0.32	1.05521e-85	6	DCTPP1
1.11715e-89	0.280388	0.595	0.319	4.08887e-85	6	MYO1C
1.83856e-89	0.298386	0.687	0.414	6.7293e-85	6	GGCT
1.67268e-88	0.403185	0.774	0.503	6.12219e-84	6	CCND1
3.6078e-88	0.260482	0.652	0.357	1.32049e-83	6	NUDT1
3.73679e-88	0.314923	0.768	0.47	1.3677e-83	6	TSPAN4
3.81821e-88	0.32279	0.771	0.521	1.3975e-83	6	CENPX
4.8878e-88	0.377081	0.844	0.569	1.78898e-83	6	C12orf75
2.58372e-86	0.377805	0.708	0.371	9.45666e-82	6	THBS1
3.21892e-86	0.269614	0.651	0.358	1.17816e-81	6	MZT2A
1.83189e-85	0.260243	0.653	0.37	6.70491e-81	6	RRP7A
1.06976e-83	0.278755	0.559	0.288	3.91542e-79	6	CARHSP1
2.2058e-83	0.260936	0.597	0.319	8.07346e-79	6	CD3EAP
6.72171e-83	0.277589	0.664	0.381	2.46021e-78	6	PDLIM7
8.50624e-83	0.326052	0.807	0.594	3.11337e-78	6	KPNB1
2.3413e-82	0.251963	0.62	0.342	8.56938e-78	6	MSRB3
2.50945e-81	0.253898	0.631	0.354	9.18483e-77	6	ZYX
3.05911e-81	0.308301	0.829	0.661	1.11966e-76	6	CAP1
4.33336e-81	0.277209	0.663	0.377	1.58605e-76	6	AXL
1.03826e-80	0.289721	0.7	0.435	3.80014e-76	6	VASP
2.91415e-80	0.335094	0.786	0.593	1.06661e-75	6	ACTN1
2.22102e-79	0.344098	0.506	0.256	8.12914e-75	6	PTTG1
2.67115e-79	0.26408	0.661	0.39	9.77667e-75	6	BCL7C
4.09066e-79	0.312638	0.776	0.538	1.49722e-74	6	SMS
7.63847e-79	0.254958	0.855	0.741	2.79576e-74	6	LDHB
9.47752e-79	0.257658	0.601	0.326	3.46887e-74	6	EPS8
4.12073e-77	0.354443	0.814	0.602	1.50823e-72	6	PHLDA2
6.89817e-75	0.262896	0.689	0.416	2.5248e-70	6	COMMD4
8.22001e-75	0.42887	0.565	0.32	3.0086e-70	6	CRYAB
2.30195e-73	0.338463	0.916	0.713	8.42538e-69	6	SERPINE1
6.08379e-71	0.283867	0.827	0.654	2.22673e-66	6	SRSF2
6.3079e-71	0.304565	0.802	0.578	2.30875e-66	6	PLP2
1.10017e-70	0.282974	0.706	0.448	4.02674e-66	6	JPT1
1.26765e-70	0.312429	0.732	0.478	4.63971e-66	6	SERPINH1
3.4894e-70	0.281933	0.798	0.588	1.27715e-65	6	LSM5
4.7409e-70	0.267905	0.719	0.469	1.73522e-65	6	ACTN4
3.90446e-68	0.286317	0.728	0.473	1.42907e-63	6	LIMA1
4.74548e-68	0.288167	0.646	0.384	1.73689e-63	6	GADD45B
9.41363e-68	0.318974	0.78	0.522	3.44548e-63	6	CCDC80
3.02553e-66	0.278157	0.833	0.647	1.10737e-61	6	PEBP1
4.0065e-66	0.27981	0.785	0.549	1.46642e-61	6	CALM3
6.61348e-66	0.257577	0.849	0.693	2.4206e-61	6	MRPL20
1.621e-65	0.27789	0.75	0.532	5.93301e-61	6	LSM2
2.9009e-65	0.263894	0.735	0.473	1.06176e-60	6	MIR4435-2HG
3.62753e-65	0.264541	0.775	0.556	1.32771e-60	6	WDR1
4.01387e-65	0.306199	0.87	0.695	1.46912e-60	6	UBE2S
1.10251e-64	0.279188	0.772	0.575	4.03528e-60	6	MTCH1
1.62619e-64	0.287003	0.819	0.58	5.95201e-60	6	FXYD5
1.85324e-64	0.306197	0.747	0.505	6.78303e-60	6	MAP1B
1.45118e-62	0.260606	0.751	0.529	5.31145e-58	6	TBCB
1.55743e-62	0.254747	0.725	0.479	5.70035e-58	6	PPDPF
8.54802e-62	0.279559	0.851	0.661	3.12866e-57	6	COTL1
1.04623e-61	0.262459	0.794	0.61	3.82931e-57	6	PPM1G
1.60292e-60	0.262793	0.81	0.644	5.86683e-56	6	STOML2
1.04747e-59	0.253795	0.745	0.525	3.83384e-55	6	VPS29
1.35523e-58	0.267204	0.735	0.532	4.96028e-54	6	PPP1CA
7.5645e-58	0.253947	0.757	0.527	2.76868e-53	6	RAB34
1.48125e-57	0.277306	0.792	0.61	5.42154e-53	6	FLNA
3.39125e-57	0.279835	0.809	0.595	1.24123e-52	6	EIF4EBP1
1.66385e-56	0.25358	0.771	0.587	6.08987e-52	6	RAB5C
5.97895e-56	0.254965	0.768	0.555	2.18836e-51	6	CYB5R3
1.47024e-54	0.275459	0.775	0.53	5.38123e-50	6	SPARC
5.0906e-51	0.253623	0.78	0.625	1.86321e-46	6	TLN1
1.12152e-49	0.310053	0.793	0.583	4.10489e-45	6	ID3
3.6631e-45	0.283759	0.766	0.561	1.34073e-40	6	NQO1
4.96568e-45	0.292553	0.809	0.566	1.81749e-40	6	COL1A1
1.63287e-115	0.426729	0.854	0.854	5.97645e-111	7	NEAT1
3.14453e-104	0.262435	0.821	0.882	1.15093e-99	7	MT-ND5
6.79701e-62	0.449271	0.656	0.575	2.48777e-57	7	COL1A1
1.98542e-55	0.360032	0.647	0.648	7.26684e-51	7	COL1A2
1.47895e-52	0.366381	0.671	0.66	5.41312e-48	7	FN1
1.61553e-47	0.308324	0.665	0.706	5.91302e-43	7	COL6A1
2.53396e-42	0.450493	0.507	0.383	9.27454e-38	7	THBS1
5.70683e-42	0.361919	0.604	0.534	2.08876e-37	7	HAS2
1.80968e-39	0.323146	0.694	0.653	6.62362e-35	7	INHBA
1.79674e-37	0.295067	0.613	0.658	6.57624e-33	7	COL6A3
3.99456e-37	0.267641	0.702	0.725	1.46205e-32	7	SERPINE1
4.44782e-23	0.269194	0.625	0.617	1.62795e-18	7	COL3A1
1.09104e-20	0.311022	0.515	0.545	3.99332e-16	7	SPARC
1.71542e-19	0.305619	0.627	0.559	6.27862e-15	7	MMP1
1.82725e-14	0.257227	0.274	0.19	6.68791e-10	7	EREG
4.77359e-14	0.332664	0.426	0.416	1.74718e-09	7	ADAMTS1
3.06355e-13	0.323624	0.45	0.472	1.12129e-08	7	TGFBI
1.7789e-08	0.296813	0.397	0.417	0.000651095	7	WNT5A
5.35545e-08	0.293695	0.409	0.443	0.00196015	7	FBN1
8.62808e-08	0.309518	0.376	0.394	0.00315796	7	MT-ND6
0.000511983	0.260466	0.314	0.341	1	7	COL5A2
0.00144099	0.257462	0.406	0.485	1	7	SLC38A2
6.19022e-172	0.423841	0.468	0.129	2.26568e-167	8	SULF1
1.81557e-108	0.257955	0.343	0.104	6.64518e-104	8	CPE
2.50426e-80	0.41974	0.841	0.653	9.16585e-76	8	FN1
1.36802e-79	0.547496	0.389	0.162	5.00709e-75	8	SPP1
3.26498e-68	0.316157	0.539	0.3	1.19502e-63	8	C1GALT1
8.64218e-68	0.336549	0.541	0.3	3.16313e-63	8	HPCAL1
8.61736e-64	0.380603	0.758	0.507	3.15404e-59	8	CCND1
6.23379e-62	0.274537	0.492	0.248	2.28163e-57	8	SLC16A3
2.36817e-61	0.298862	0.507	0.272	8.66775e-57	8	GJA1
1.93375e-55	0.250814	0.506	0.263	7.07771e-51	8	AOPEP
2.56794e-48	0.295903	0.897	0.821	9.3989e-44	8	DCN
1.13129e-43	0.273236	0.753	0.588	4.14062e-39	8	S100A13
3.87253e-41	0.305811	0.346	0.172	1.41738e-36	8	TNFRSF11B
3.89437e-41	0.260354	0.623	0.428	1.42538e-36	8	EMP2
8.81696e-39	0.359947	0.679	0.501	3.2271e-34	8	TIMP3
2.35229e-38	0.268935	0.778	0.653	8.60961e-34	8	NNMT
1.10353e-34	0.285462	0.619	0.469	4.03904e-30	8	PMEPA1
1.40256e-31	0.285541	0.578	0.381	5.13349e-27	8	THBS1
1.85219e-31	0.268163	0.918	0.799	6.77921e-27	8	SERPINE2
9.61398e-30	0.285752	0.83	0.686	3.51881e-25	8	S100A4
1.16357e-29	0.282159	0.736	0.547	4.25879e-25	8	LUM
7.54042e-25	0.276893	0.471	0.327	2.75987e-20	8	CRYAB
2.42537e-22	0.255473	0.727	0.646	8.87709e-18	8	MT1M
1.45865e-128	0.465311	0.254	0.053	5.33882e-124	9	PRG4
8.05003e-89	0.477518	0.902	0.76	2.94639e-84	9	CXCL1
1.00789e-71	0.368765	0.965	0.861	3.68897e-67	9	MMP3
4.82472e-71	0.362054	0.381	0.155	1.76589e-66	9	IFI27
5.62997e-69	0.43168	0.439	0.183	2.06063e-64	9	EREG
1.54383e-68	0.420844	0.898	0.683	5.65058e-64	9	S100A4
2.14326e-62	0.480758	0.789	0.552	7.84453e-58	9	MMP1
1.3066e-61	0.439285	0.656	0.388	4.7823e-57	9	C15orf48
5.39243e-60	0.398213	0.803	0.558	1.97368e-55	9	TNFAIP6
1.29526e-56	0.379123	0.415	0.187	4.74078e-52	9	CHI3L1
5.78988e-50	0.311987	0.343	0.16	2.11915e-45	9	CLU
1.02473e-44	0.391982	0.74	0.508	3.7506e-40	9	CCL20
2.06799e-38	0.282133	0.934	0.799	7.56903e-34	9	SERPINE2
4.57296e-36	0.335296	0.642	0.446	1.67375e-31	9	CCL2
1.33145e-33	0.264024	0.432	0.249	4.87322e-29	9	G0S2
1.38622e-33	0.275855	0.877	0.764	5.07369e-29	9	IL6
1.48415e-33	0.286909	0.712	0.562	5.43215e-29	9	TM4SF1
5.912e-30	0.264315	0.618	0.463	2.16385e-25	9	CD9
2.64722e-26	0.267364	0.415	0.252	9.68911e-22	9	CXCL6
6.09108e-22	0.291888	0.458	0.316	2.2294e-17	9	IL24
